# Supplementary material for: Chemical bonding in Period 2 homonuclear diatomic molecules: a comprehensive relook
Source: Springer Nature journal article supplement (doi:10.1007/s12039-019-1707-5), 2019-12-01
Supplement: MOESM1 [file 12039_2019_1707_MOESM1_ESM.pdf]

## SUPPLEMENTARY INFORMATION

### **Chemical bonding in Period II Homonuclear Diatomic Molecules: A comprehensive Relook**

A DAS and E ARUNAN

Department of Inorganic and Physical Chemistry, Indian Institute of Science, Bangalore 560012,  
India

Email: arunan@iisc.ac.in

#### **Table of contents:**

Tables ST1-ST13                      Pages 1-5

Figures SF1-SF8                      Pages 6-9

Reference 79                              Page 9

**Table ST1:** Method and Basis Set Dependence of Be<sub>2</sub> bond distance

|                      | 6-311G** | aug-cc-pVDZ | aug-cc-pVTZ | aug-cc-pVQZ |
|----------------------|----------|-------------|-------------|-------------|
| <i>HF</i>            | 6.389    | 6.922       | 6.921       | 6.920       |
| <i>B3LYP</i>         | 2.492    | 2.503       | 2.482       | 2.482       |
| <i>M06-2X</i>        | 2.747    | 2.754       | 2.743       | -           |
| <i>PBEPBE</i>        | 2.434    | 2.440       | 2.425       | -           |
| <i>MP2</i>           | 4.074    | 3.924       | 2.780       | 2.726       |
| <i>MP2(FULL)</i>     | 2.917    | 3.867       | 2.451       | 2.609       |
| <i>CCSD(T)</i>       | -        | 2.501       | 2.532       | 2.501       |
| <i>CCSD(T)(FULL)</i> | -        | 2.436       | 2.343       | 2.427       |

**Atoms in Molecules Analysis:****Table ST2:** Basis Set Dependence on Topological Properties of Li<sub>2</sub> Molecule.

| <i>DFT</i>     | $\rho(r)$ | $\nabla^2\rho$ | $\lambda_1=\lambda_2$ | $\lambda_3$ | $ \lambda_1 /\lambda_3$ | <i>V</i> | <i>G</i> | $ V /G$ |
|----------------|-----------|----------------|-----------------------|-------------|-------------------------|----------|----------|---------|
| 6-311G++(d,p)  | 0.0137    | 0.00203        | -0.0056               | 0.0132      | 0.424                   | -0.0063  | 0.0034   | 1.85    |
| aug-cc-pVDZ    | 0.0128    | 0.01073        | -0.0049               | 0.0205      | 0.239                   | -0.0060  | 0.0043   | 1.40    |
| aug-cc-pVTZ    | 0.0137    | 0.00560        | -0.0056               | 0.0169      | 0.331                   | -0.0062  | 0.0038   | 1.63    |
| <b>MP2</b>     |           |                |                       |             |                         |          |          |         |
| 6-311G++(d,p)  | 0.0132    | 0.00424        | -0.0054               | 0.0150      | 0.360                   | -0.0064  | 0.0037   | 1.73    |
| aug-cc-pVDZ    | 0.0125    | 0.01124        | -0.0049               | 0.0210      | 0.233                   | -0.0060  | 0.0044   | 1.36    |
| aug-cc-pVTZ    | 0.0129    | 0.00891        | -0.0053               | 0.0195      | 0.272                   | -0.0062  | 0.0042   | 1.48    |
| <b>CCSD(T)</b> |           |                |                       |             |                         |          |          |         |
| 6-311G++(d,p)  | 0.0132    | 0.00424        | -0.0054               | 0.0150      | 0.360                   | -0.0064  | 0.0037   | 1.73    |
| aug-cc-pVDZ    | 0.0125    | 0.01121        | -0.0049               | 0.0210      | 0.233                   | -0.0060  | 0.0044   | 1.36    |
| aug-cc-pVTZ    | 0.0129    | 0.00891        | -0.0053               | 0.0195      | 0.272                   | -0.0062  | 0.0042   | 1.48    |

**Table ST3:** Basis Set Dependence on Topological Properties of Be<sub>2</sub> Molecule

| <i>DFT</i>     | $\rho(r)$ | $\nabla^2\rho$ | $\lambda_1=\lambda_2$ | $\lambda_3$ | $ \lambda_1 /\lambda_3$ | <i>V</i> | <i>G</i> | $ V /G$ |
|----------------|-----------|----------------|-----------------------|-------------|-------------------------|----------|----------|---------|
| 6-311G++(d,p)  | 0.0342    | -0.0337        | -0.0237               | 0.0137      | 1.730                   | -0.0109  | 0.0012   | 9.08    |
| aug-cc-pVDZ    | 0.0345    | -0.0336        | -0.0235               | 0.0134      | 1.754                   | -0.0112  | 0.0014   | 8.00    |
| aug-cc-pVTZ    | 0.0351    | -0.0374        | -0.0260               | 0.0146      | 1.781                   | -0.0120  | 0.0013   | 9.23    |
| <b>MP2</b>     |           |                |                       |             |                         |          |          |         |
| 6-311G++(d,p)  | 0.0311    | -0.0280        | -0.0206               | 0.0131      | 1.573                   | -0.0108  | 0.0019   | 5.68    |
| aug-cc-pVDZ    | 0.0312    | -0.0270        | -0.0206               | 0.0142      | 1.451                   | -0.0109  | 0.0021   | 5.19    |
| aug-cc-pVTZ    | 0.0318    | -0.0318        | -0.0223               | 0.0135      | 1.652                   | -0.0117  | 0.0019   | 6.16    |
| <b>CCSD(T)</b> |           |                |                       |             |                         |          |          |         |
| 6-311G++(d,p)  | 0.0311    | -0.0280        | -0.0206               | 0.0131      | 1.573                   | -0.0108  | 0.0019   | 5.68    |
| aug-cc-pVDZ    | 0.0312    | -0.0270        | -0.0206               | 0.0142      | 1.451                   | -0.0109  | 0.0021   | 5.19    |
| aug-cc-pVTZ    | 0.0318    | -0.0311        | -0.0223               | 0.0135      | 1.652                   | -0.0117  | 0.0019   | 6.16    |

**Table ST4:** Basis Set Dependence on Topological Properties of B<sub>2</sub> (Triplet) Molecule

| <i>DFT</i>           | $\rho(r)$ | $\nabla^2\rho$ | $\lambda_1=\lambda_2$ | $\lambda_3$ | $ \lambda_1 /\lambda_3$ | <i>V</i> | <i>G</i> | $ V /G$ |
|----------------------|-----------|----------------|-----------------------|-------------|-------------------------|----------|----------|---------|
| <i>6-311G++(d,p)</i> | 0.1321    | -0.1983        | -0.101                | 0.0038      | 26.579                  | -0.1901  | 0.0703   | 2.70    |
| <i>aug-cc-pVDZ</i>   | 0.1281    | +0.0431        | -0.0818               | 0.2067      | 0.396                   | -0.2494  | 0.1301   | 1.92    |
| <i>aug-cc-pVTZ</i>   | 0.1365    | -0.1086        | -0.1156               | 0.1226      | 0.943                   | -0.2438  | 0.1083   | 2.25    |
| <b>MP2</b>           |           |                |                       |             |                         |          |          |         |
| <i>6-311G++(d,p)</i> | 0.1204    | 0.0018         | -0.0637               | 0.1291      | 0.493                   | -0.2262  | 0.1133   | 2.00    |
| <i>aug-cc-pVDZ</i>   | 0.1172    | 0.1071         | -0.0538               | 0.2147      | 0.251                   | -0.2334  | 0.1301   | 1.79    |
| <i>aug-cc-pVTZ</i>   | 0.1236    | 0.0768         | -0.0784               | 0.2336      | 0.336                   | -0.2538  | 0.1365   | 1.86    |
| <b>CCSD(T)</b>       |           |                |                       |             |                         |          |          |         |
| <i>6-311G++(d,p)</i> | 0.1204    | 0.0018         | -0.0637               | 0.1291      | 0.493                   | -0.2262  | 0.1129   | 2.00    |
| <i>aug-cc-pVDZ</i>   | 0.1172    | 0.1071         | -0.0538               | 0.2147      | 0.251                   | -0.2334  | 0.1301   | 1.79    |
| <i>aug-cc-pVTZ</i>   | 0.1236    | 0.0768         | -0.0784               | 0.2336      | 0.336                   | -0.2538  | 0.1365   | 1.86    |

**Table ST5:** Basis Set Dependence on Topological Properties of C<sub>2</sub> Molecule

| <i>DFT</i>           | $\rho(r)$ | $\nabla^2\rho$ | $\lambda_1=\lambda_2$ | $\lambda_3$ | $ \lambda_1 /\lambda_3$ | <i>V</i> | <i>G</i> | $ V /G$ |
|----------------------|-----------|----------------|-----------------------|-------------|-------------------------|----------|----------|---------|
| <i>6-311G++(d,p)</i> | 0.2867    | -0.3315        | -0.1788               | 0.0260      | 6.877                   | -0.6233  | 0.2702   | 2.31    |
| <i>aug-cc-pVDZ</i>   | -         | -              | -                     | -           | -                       | -        | -        | -       |
| <i>aug-cc-pVTZ</i>   | 0.2969    | +0.1963        | -0.0947               | +0.3856     | 0.245                   | -1.0031  | +0.5261  | 1.91    |
| <b>MP2</b>           |           |                |                       |             |                         |          |          |         |
| <i>6-311G++(d,p)</i> | 0.2924    | -0.4678        | -0.2574               | +0.0469     | 5.488                   | -0.5910  | +0.2370  | 2.49    |
| <i>aug-cc-pVDZ</i>   | 0.2833    | -0.4152        | -0.2444               | +0.0735     | 3.325                   | -0.5408  | +0.2185  | 2.48    |
| <i>aug-cc-pVTZ</i>   | 0.3108    | +0.0248        | -0.2065               | +0.4378     | 0.472                   | -1.0282  | +0.5172  | 1.99    |
| <b>CCSD(T)</b>       |           |                |                       |             |                         |          |          |         |
| <i>6-311G++(d,p)</i> | -         | -              | -                     | -           | -                       | -        | -        | -       |
| <i>aug-cc-pVDZ</i>   | -         | -              | -                     | -           | -                       | -        | -        | -       |
| <i>aug-cc-pVTZ</i>   | -         | -              | -                     | -           | -                       | -        | -        | -       |

**Table ST6:** Basis Set Dependence on Topological Properties of N<sub>2</sub> Molecule

| <i>DFT</i>           | $\rho(r)$ | $\nabla^2\rho$ | $\lambda_1=\lambda_2$ | $\lambda_3$ | $ \lambda_1 /\lambda_3$ | <i>V</i> | <i>G</i> | $ V /G$ |
|----------------------|-----------|----------------|-----------------------|-------------|-------------------------|----------|----------|---------|
| <i>6-311G++(d,p)</i> | 0.6821    | -2.5882        | -1.7090               | +0.8299     | 2.509                   | -1.8192  | +0.5861  | 3.10    |
| <i>aug-cc-pVDZ</i>   | 0.6606    | -2.0244        | -1.5847               | +1.1451     | 1.384                   | -1.6008  | +0.5474  | 2.92    |
| <i>aug-cc-pVTZ</i>   | 0.7267    | -3.4632        | -2.0148               | +0.5665     | 3.557                   | -2.1299  | +0.6320  | 3.37    |
| <b>MP2</b>           |           |                |                       |             |                         |          |          |         |
| <i>6-311G++(d,p)</i> | 0.6372    | -2.1834        | -1.5426               | +0.9018     | 1.711                   | -1.6601  | +0.5571  | 2.98    |
| <i>aug-cc-pVDZ</i>   | 0.6121    | -1.6616        | -1.4342               | +1.2068     | 1.188                   | -1.4383  | +0.5114  | 2.81    |
| <i>aug-cc-pVTZ</i>   | 0.6805    | -3.0149        | -1.8407               | +0.6664     | 2.762                   | -1.9517  | +0.5990  | 3.26    |
| <b>CCSD(T)</b>       |           |                |                       |             |                         |          |          |         |
| <i>6-311G++(d,p)</i> | 0.6688    | -2.5537        | -1.6083               | +0.6629     | 2.426                   | -1.7679  | +0.5647  | 3.13    |
| <i>aug-cc-pVDZ</i>   | 0.6401    | -1.9387        | -1.4955               | +1.0522     | 1.421                   | -1.5168  | +0.5160  | 2.94    |
| <i>aug-cc-pVTZ</i>   | 0.7131    | -3.4261        | -1.9157               | +0.4052     | 4.728                   | -2.0735  | +0.6085  | 3.41    |

**Table ST7:** Basis Set Dependence on Topological Properties of O<sub>2</sub> (triplet) Molecule

| <i>DFT</i>           | $\rho(r)$ | $\nabla^2\rho$ | $\lambda_1=\lambda_2$ | $\lambda_3$ | $ \lambda_1/\lambda_3$ | <i>V</i> | <i>G</i> | <i> V /G</i> |
|----------------------|-----------|----------------|-----------------------|-------------|------------------------|----------|----------|--------------|
| <i>6-311G++(d,p)</i> | 0.5395    | -0.7650        | -1.4931               | +2.2212     | 0.672                  | -1.1265  | +0.4676  | 2.41         |
| <i>aug-cc-pVDZ</i>   | 0.5357    | -0.9035        | -1.4030               | +1.9024     | 0.737                  | -1.1775  | +0.4758  | 2.47         |
| <i>aug-cc-pVTZ</i>   | 0.5386    | -0.6575        | -1.5204               | +2.3834     | 0.638                  | -1.1234  | +0.4795  | 2.34         |
| <b>MP2</b>           |           |                |                       |             |                        |          |          |              |
| <i>6-311G++(d,p)</i> | 0.5092    | -0.5482        | -1.3725               | +2.1968     | 0.625                  | -1.0975  | +0.4803  | 2.29         |
| <i>aug-cc-pVDZ</i>   | 0.4921    | -0.6268        | -1.2512               | +1.8757     | 0.667                  | -1.1017  | +0.4725  | 2.33         |
| <i>aug-cc-pVTZ</i>   | 0.5059    | -0.3669        | -1.3694               | +2.3719     | 0.577                  | -1.0829  | +0.4956  | 2.19         |
| <b>CCSD(T)</b>       |           |                |                       |             |                        |          |          |              |
| <i>6-311G++(d,p)</i> | 0.5295    | -0.9367        | -1.4629               | +1.9390     | 0.754                  | -1.1081  | +0.4370  | 2.54         |
| <i>aug-cc-pVDZ</i>   | 0.5257    | -1.0319        | -1.3538               | +1.6757     | 0.808                  | -1.1482  | +0.4451  | 2.58         |
| <i>aug-cc-pVTZ</i>   | 0.5249    | -0.8862        | -1.4977               | +2.1092     | 0.710                  | -1.1479  | +0.4632  | 2.48         |

**Table ST8:** Basis Set Dependence on Topological Properties of F<sub>2</sub> Molecule

| <i>DFT</i>           | $\rho(r)$ | $\nabla^2\rho$ | $\lambda_1=\lambda_2$ | $\lambda_3$ | $ \lambda_1/\lambda_3$ | <i>V</i> | <i>G</i> | <i> V /G</i> |
|----------------------|-----------|----------------|-----------------------|-------------|------------------------|----------|----------|--------------|
| <i>6-311G++(d,p)</i> | 0.2674    | +0.5937        | -0.7095               | +2.0127     | 0.353                  | -0.3865  | +0.2675  | 1.44         |
| <i>aug-cc-pVDZ</i>   | 0.2781    | +0.5177        | -0.7245               | +1.9666     | 0.368                  | -0.4199  | +0.2747  | 1.53         |
| <i>aug-cc-pVTZ</i>   | 0.2964    | +0.4591        | -0.7281               | +1.9153     | 0.380                  | -0.4644  | +0.2896  | 1.60         |
| <b>MP2</b>           |           |                |                       |             |                        |          |          |              |
| <i>6-311G++(d,p)</i> | 0.2555    | +0.6791        | -0.6670               | +2.0130     | 0.331                  | -0.3913  | +0.2805  | 1.40         |
| <i>aug-cc-pVDZ</i>   | 0.2519    | +0.6519        | -0.6247               | +1.9013     | 0.329                  | -0.3913  | +0.2771  | 1.41         |
| <i>aug-cc-pVTZ</i>   | 0.2900    | +0.5200        | -0.7030               | +1.9260     | 0.365                  | -0.4950  | +0.3125  | 1.58         |
| <b>CCSD(T)</b>       |           |                |                       |             |                        |          |          |              |
| <i>6-311G++(d,p)</i> | 0.2461    | +0.4722        | -0.6152               | +1.7026     | 0.361                  | -0.3216  | +0.2198  | 1.46         |
| <i>aug-cc-pVDZ</i>   | 0.2500    | +0.4029        | -0.6045               | +1.6119     | 0.375                  | -0.3281  | +0.2144  | 1.53         |
| <i>aug-cc-pVTZ</i>   | 0.2973    | +0.2002        | -0.7250               | +1.6502     | 0.439                  | -0.4648  | +0.2575  | 1.81         |

**Table ST9:** Basis Set Dependence on Topological Properties of Ne<sub>2</sub> Molecule

| <i>DFT</i>           | $\rho(r)$ | $\nabla^2\rho$ | $\lambda_1=\lambda_2$ | $\lambda_3$ | $ \lambda_1/\lambda_3$ | <i>V</i> | <i>G</i> | <i> V /G</i> |
|----------------------|-----------|----------------|-----------------------|-------------|------------------------|----------|----------|--------------|
| <i>6-311G++(d,p)</i> | 0.0019    | +0.0147        | -0.0021               | +0.0188     | 0.112                  | -0.0016  | +0.0026  | 0.62         |
| <i>aug-cc-pVDZ</i>   | 0.0006    | +0.0046        | -0.0005               | +0.0056     | 0.089                  | -0.0002  | +0.0007  | 0.29         |
| <i>aug-cc-pVTZ</i>   | 0.0009    | +0.0060        | -0.0008               | +0.0076     | 0.105                  | -0.0006  | +0.0011  | 0.55         |
| <b>MP2</b>           |           |                |                       |             |                        |          |          |              |
| <i>6-311G++(d,p)</i> | 0.0018    | +0.0148        | -0.0020               | +0.0187     | 0.107                  | -0.0016  | +0.0027  | 0.59         |
| <i>aug-cc-pVDZ</i>   | 0.0011    | +0.0104        | -0.0012               | +0.0127     | 0.094                  | -0.0007  | +0.0017  | 0.41         |
| <i>aug-cc-pVTZ</i>   | 0.0015    | +0.0099        | -0.0015               | +0.0129     | 0.116                  | -0.0013  | +0.0019  | 0.68         |
| <b>CCSD(T)</b>       |           |                |                       |             |                        |          |          |              |
| <i>6-311G++(d,p)</i> | 0.0016    | +0.0146        | -0.0019               | +0.0184     | 0.103                  | -0.0016  | +0.0026  | 0.62         |
| <i>aug-cc-pVDZ</i>   | 0.0011    | +0.0121        | -0.0013               | +0.0148     | 0.088                  | -0.0010  | +0.0020  | 0.50         |
| <i>aug-cc-pVTZ</i>   | 0.0021    | +0.0131        | -0.0022               | +0.0175     | 0.126                  | -0.0019  | +0.0026  | 0.73         |

**Table ST10:** Electron Density on atoms and NNA for Li<sub>2</sub>, B<sub>2</sub>, and C<sub>2</sub>. (In case of C<sub>2</sub> wave function at CCSD/aug-cc-pVTZ level used for calculation.

| <i>Diatoms</i>        | <i>R(D-D)</i> | <i>ρ(D)</i> | <i>R(D-BCP)</i> | <i>R(NNA-BCP)</i> | <i>ρ(NNA)</i> |
|-----------------------|---------------|-------------|-----------------|-------------------|---------------|
| <i>Li<sub>2</sub></i> | 2.667         | 13.524      | 0.935           | 0.395             | 0.014         |
| <i>B<sub>2</sub></i>  | 1.587         | 69.042      | 0.526           | 0.266             | 0.128         |
| <i>*C<sub>2</sub></i> | 1.247         | 122.014     | 0.446           | 0.177             | 0.319         |

**R(D-D):** Distance between diatoms (D), **ρ(D):** Electron density on the diatoms, **R(D-BCP):** Distance between BCP and atom, **R(NNA-BCP):** Distance between non-nuclear attractor and BCP, **ρ(NNA):** Electron density on non-nuclear attractor

**Table ST11:** Properties of Diatoms from atoms in molecules analysis. (In case of C<sub>2</sub> wave function at CCSD/aug-cc-pVTZ level used for calculation.

| <i>Diatoms</i>        | <i>Δρ(D)</i> | <i>ΔVol(D)</i> | <i>ΔESP(D)</i> |
|-----------------------|--------------|----------------|----------------|
| <i>Li<sub>2</sub></i> | -0.0108      | -188.6638      | 0.0272         |
| <i>Be<sub>2</sub></i> | -0.0365      | -40.641        | 0.001          |
| <i>B<sub>2</sub></i>  | -0.0948      | -61.566        | 0.0135         |
| <i>*C<sub>2</sub></i> | -0.1518      | -103.734       | 0.0419         |
| <i>N<sub>2</sub></i>  | -0.4061      | -38.767        | 0.0673         |
| <i>O<sub>2</sub></i>  | -0.5882      | -29.6879       | 0.0727         |
| <i>F<sub>2</sub></i>  | -0.0494      | -20.6957       | 0.0494         |
| <i>Ne<sub>2</sub></i> | -0.0054      | -2.4548        | 0.0002         |

Δ Difference between (Diatom-Atom). Δρ(D) : Difference in electron density between diatom(D-D) and atom(D).

**Table ST12:** Ground and low lying electronic states (<10000 cm<sup>-1</sup>) of B<sub>2</sub> and C<sub>2</sub>.

| <i>B<sub>2</sub></i>                               | <i>Electronic States (cm<sup>-1</sup>)</i> | <i>C<sub>2</sub></i>                               | <i>Electronic States (cm<sup>-1</sup>)</i> |
|----------------------------------------------------|--------------------------------------------|----------------------------------------------------|--------------------------------------------|
| <i>X<sup>3</sup>Σ<sub>g</sub><sup>-</sup> (GS)</i> | 0                                          | <i>X<sup>1</sup>Σ<sub>g</sub><sup>+</sup> (GS)</i> | 0                                          |
| <i><sup>5</sup>Σ<sub>u</sub><sup>-</sup></i>       | 1833 <sup>a</sup> , 1826 <sup>b</sup>      | <i>a<sup>3</sup>Π<sub>u</sub></i>                  | 450 <sup>b</sup> , 716.2 <sup>c</sup>      |
| <i>A<sup>3</sup>Π<sub>u</sub></i>                  | 3380 <sup>a</sup> , 3374 <sup>b</sup>      | <i>b<sup>3</sup>Σ<sub>g</sub><sup>-</sup></i>      | 5914 <sup>b</sup> , 6434.3 <sup>c</sup>    |
| <i>b<sup>1</sup>Δ<sub>g</sub></i>                  | 4616 <sup>a</sup> , 4335 <sup>b</sup>      | <i>A<sup>1</sup>Π<sub>u</sub></i>                  | 7915 <sup>b</sup> , 8391.4 <sup>c</sup>    |
| <i>c<sup>1</sup>Σ<sub>g</sub><sup>+</sup></i>      | 7319 <sup>a</sup> , 7205 <sup>b</sup>      | <i>c<sup>3</sup>Σ<sub>u</sub><sup>+</sup></i>      | 9417 <sup>b</sup> , 9124.2 <sup>d</sup>    |

**Table ST13:** Natural resonance theory (NRT) analysis for LiH and HF.

|            | <i>Ionic</i> | <i>Covalent</i> |
|------------|--------------|-----------------|
| <i>LiH</i> | 84.6%        | 15.4%           |
| <i>HF</i>  | 56.5%        | 43.5%           |

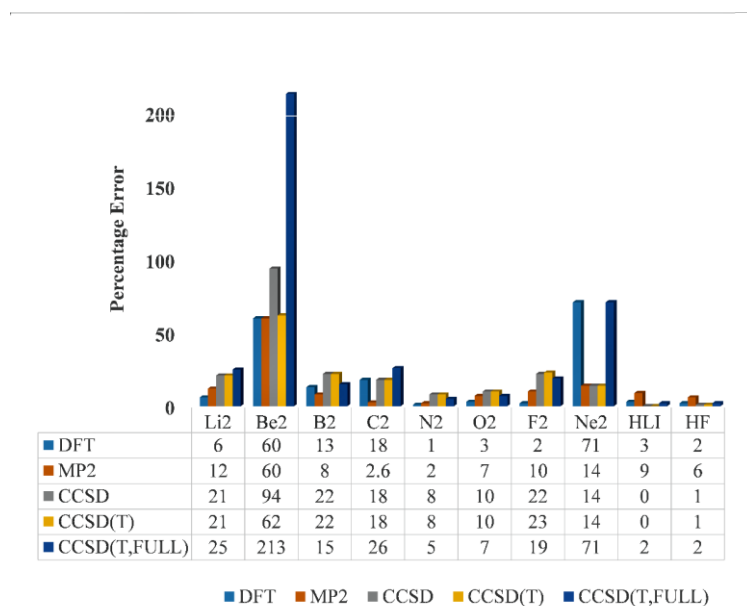

**Figure SF1:** Comparison of the percentage error of the diatoms dissociation energies.

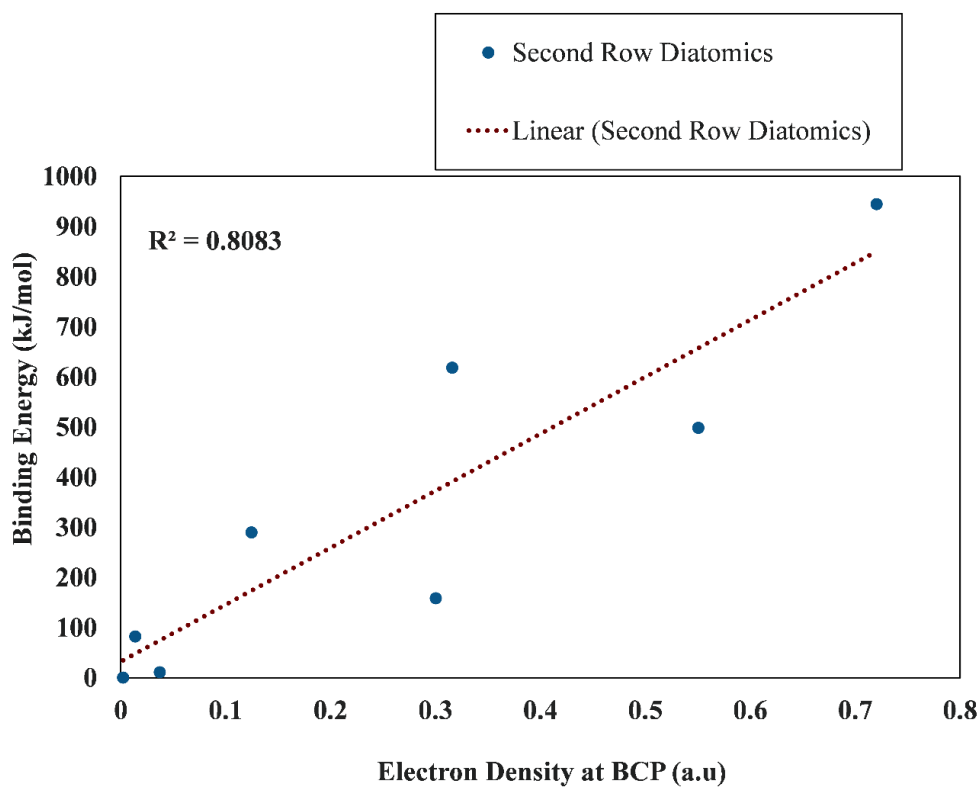

**Figure SF2:** Binding energy vs. Electron density for period 2 homonuclear diatoms.

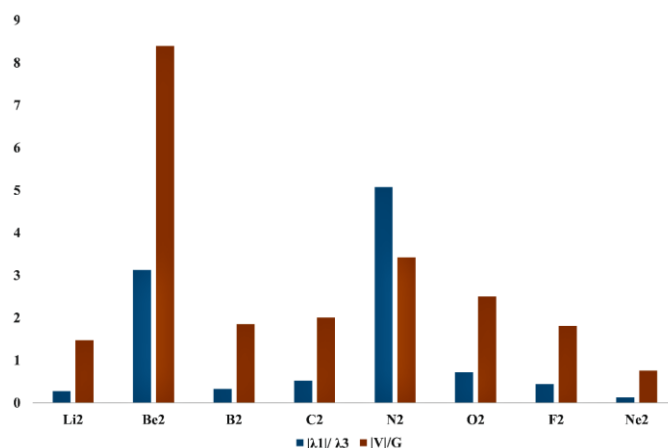

**Figure SF3:**  $|\lambda_1/\lambda_3$  and  $|V|/G$  ratio for homonuclear diatomic molecules. Range for the values are given in table 6. ( $\lambda_1/\lambda_3$ : First/third eigenvalue of Hessian matrix,  $V/G$ : Potential/Kinetic energy density)

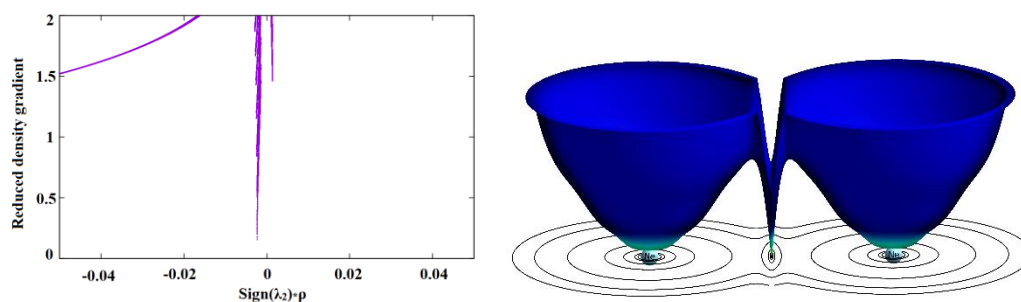

**Figure SF4:** Non-covalent index plot for  $\text{Ne}_2$  (left) and superimposed contour plot and relief map of reduced density gradient (right) for  $\text{Ne}_2$ .

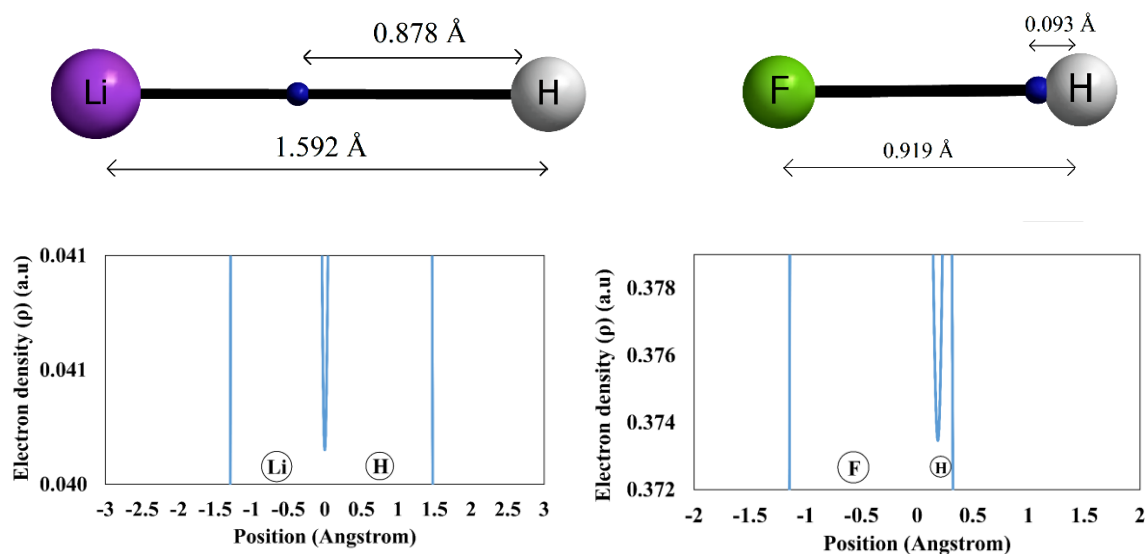

**Figure SF5:** Position of Bond critical point in LiH (top left) and HF (top right). Variation of the electron density ( $\rho$ ) along the internuclear axis of LiH (bottom left) and HF (bottom right).

| Diatoms | $1\sigma$      | $2\sigma$     | $3\sigma^*$   |               |        |
|---------|----------------|---------------|---------------|---------------|--------|
| LiH     | <b>-2.446</b>  | <b>-0.302</b> | -0.007        |               |        |
|         | $1\sigma$      | $2\sigma$     | $3\sigma$     | $1\pi, 2\pi$  |        |
| HF      | <b>-26.299</b> | <b>-1.602</b> | <b>-0.768</b> | <b>-0.650</b> | -0.031 |

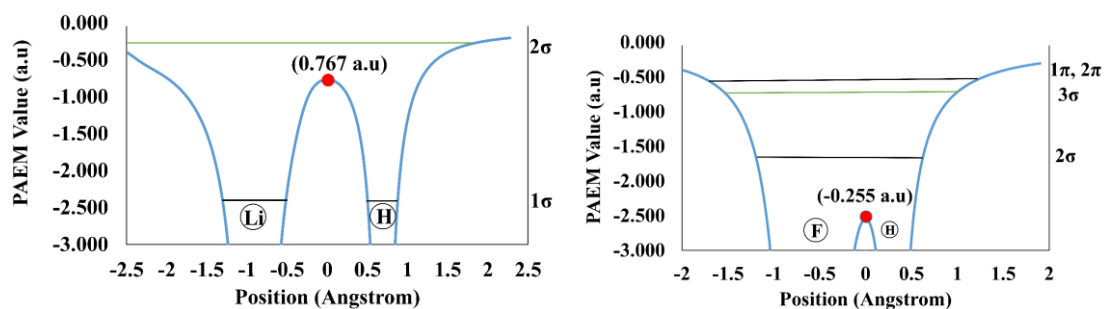

**Figure SF6:** Molecular orbitals and energy levels for LiH and HF. (Bold values are for filled orbital). Energies are in a.u. The PAEM-MO diagram along the line connecting two atoms: a) LiH molecule, b) HF molecule (Green line PAEM diagrams denotes major valence bonding orbital)

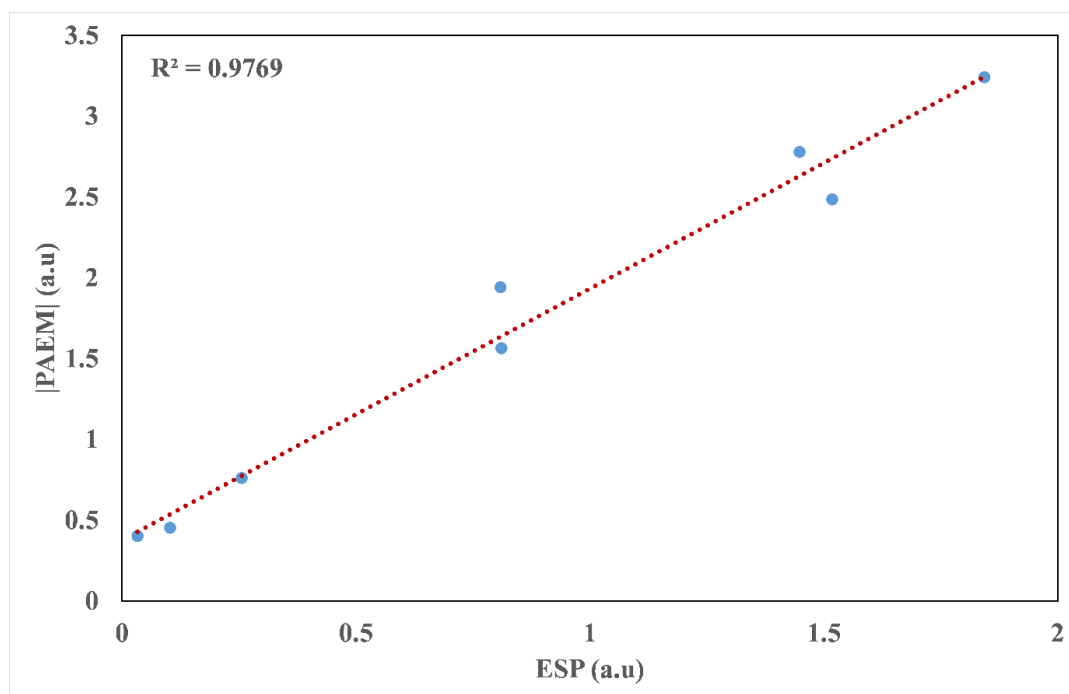

**Figure SF7:** Correlation plot between  $|PAEM|$  and ESP for homonuclear diatomics of period 2.



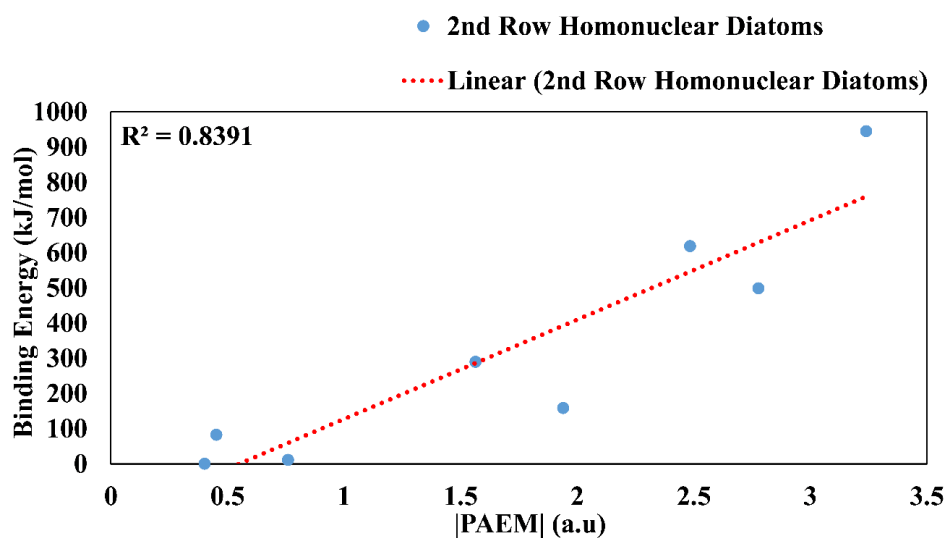

**Figure SF8:** Correlation plot between binding energy vs. |PAEM| for homonuclear diatomics of period 2.

**Reference 79:** Gaussian 09, Revision D.01, M. J. Frisch, G. W. Trucks, H. B. Schlegel, G. E. Scuseria, M. A. Robb, J. R. Cheeseman, G. Scalmani, V. Barone, G. A. Petersson, H. Nakatsuji, X. Li, M. Caricato, A. Marenich, J. Bloino, B. G. Janesko, R. Gomperts, B. Mennucci, H. P. Hratchian, J. V. Ortiz, A. F. Izmaylov, J. L. Sonnenberg, D. Williams-Young, F. Ding, F. Lipparini, F. Egidi, J. Goings, B. Peng, A. Petrone, T. Henderson, D. Ranasinghe, V. G. Zakrzewski, J. Gao, N. Rega, G. Zheng, W. Liang, M. Hada, M. Ehara, K. Toyota, R. Fukuda, J. Hasegawa, M. Ishida, T. Nakajima, Y. Honda, O. Kitao, H. Nakai, T. Vreven, K. Throssell, J. A. Montgomery, Jr., J. E. Peralta, F. Ogliaro, M. Bearpark, J. J. Heyd, E. Brothers, K. N. Kudin, V. N. Staroverov, T. Keith, R. Kobayashi, J. Normand, K. Raghavachari, A. Rendell, J. C. Burant, S. S. Iyengar, J. Tomasi, M. Cossi, J. M. Millam, M. Klene, C. Adamo, R. Cammi, J. W. Ochterski, R. L. Martin, K. Morokuma, O. Farkas, J. B. Foresman, and D. J. Fox, Gaussian, Inc., Wallingford CT, **2016**.
